# Supplementary material for: Enhancing electroreduction of NO 3 − to NH 3 over Co 3 O 4 nanowires via N-doping
Source: Royal Society of Chemistry journal article supplement (doi:10.1039/d4nj04790g), 2024-12-31
Supplement: d4nj04790g1.pdf [file d4nj04790g1.pdf]

## Supporting Information

### Experimental Section

**Materials:** Cobalt(II) nitrate hexahydrate ( $\text{Co}(\text{NO}_3)_2$ ) and ammonium fluoride ( $\text{NH}_4\text{F}$ ) were purchased from Alfa-Aesar and directly used without purification. The carbon cloth was purchased from Japan Toray Company. Sodium nitrate ( $\text{NaNO}_3$ , 99.0%), sodium nitrite ( $\text{NaNO}_2$ , 99.0%), ammonium chloride ( $\text{NH}_4\text{Cl}$ ), sodium hydroxide ( $\text{NaOH}$ ), potassium hydroxide ( $\text{KOH}$ ), sodium salicylate ( $\text{C}_7\text{H}_5\text{NaO}_3$ ), trisodium citrate dihydrate ( $\text{C}_6\text{H}_5\text{Na}_3\text{O}_7 \cdot 2\text{H}_2\text{O}$ ), p-dimethylaminobenzaldehyde ( $\text{C}_9\text{H}_{11}\text{NO}$ ), sodium nitroferricyanide dihydrate ( $\text{Na}_2\text{Fe}(\text{CN})_5\text{NO} \cdot 2\text{H}_2\text{O}$ ), 0.8wt% sulfamic acid solution ( $\text{H}_3\text{NO}_3\text{S}$ ), sodium dihydrogen phosphate dihydrate ( $\text{NaH}_2\text{PO}_4$ ), disodium hydrogen phosphate dodecahydrate ( $\text{Na}_2\text{HPO}_4$ ) and sodium hypochlorite solution ( $\text{NaClO}$ ) were purchased from Aladdin Ltd. (Shanghai, China). Ultrapure water used throughout all experiments was purified through a Millipore system.

**Characterizations:** The crystallinity and composition of the synthesized samples were characterized by X-ray diffraction (XRD; Rigaku Co.) with Cu  $K\alpha$  radiation ( $\lambda = 1.5406 \text{ \AA}$ ) and X-ray photoelectron spectroscopy (XPS; ESCALAB250Xi, Thermo Fisher Scientific). The morphological features and detailed structural information were conducted by field-emission scanning electron microscopy (FESEM; GeminiSEM, Zeiss), and transmission electron microscopy (TEM; JEOL JEM-2100F). High-angle annular dark-field scanning transmission electron microscopy (HAADF-STEM) was carried out using a JEOL JEMARM200F STEM/TEM (resolution of 0.08 nm). The absorbance data of spectrophotometer were acquired on SHIMADZU UV-1800 UV-Vis spectrophotometer.

**Synthesis of Carbon Paper @ Co<sub>3</sub>O<sub>4</sub>:** A hydrothermal solution was prepared by mixing 2 mmol Co(NO<sub>3</sub>)<sub>2</sub>, 4 mmol NH<sub>4</sub>F, 10 mmol urea, and 60 mL of deionized (DI) water. The solution was stirred continuously for 5 minutes and then transferred into Teflon-lined stainless steel autoclave liners. A piece of pressed nickel foam, cleaned with ethanol and DI water, was immersed in the reaction solution. To serve as a current collector, part of the substrate was shielded from contamination using a uniform coating of polytetrafluoroethylene tape. The autoclave was sealed and maintained at 120 °C for 6 hours. Afterward, the samples were washed with DI water, dried at 60 °C in an oven, and annealed in a furnace under an argon atmosphere at 300 °C for 2 hours, resulting in the formation of Co<sub>3</sub>O<sub>4</sub>.

**Synthesis of Carbon Paper @ N-Co<sub>3</sub>O<sub>4</sub>:** The Co<sub>3</sub>O<sub>4</sub> obtained above was subjected directly to nitrogen RF plasma treatment at room temperature to synthesize N-Co<sub>3</sub>O<sub>4</sub>. The plasma discharge was conducted at 200 W power and 13.56 MHz frequency for 20 seconds.

**Electrochemical measurements:** NO<sub>3</sub><sup>-</sup> reduction experiments were carried out in a two-compartment cell under ambient condition, which was separated by Nafion 117 membrane. The membrane was protonated by first boiling in ultrapure water for 1 h and treating in H<sub>2</sub>O<sub>2</sub> (5 wt%) aqueous solution at 80 °C for another 1 h, respectively. And then, the membrane was treated in 0.5 M H<sub>2</sub>SO<sub>4</sub> for 3 h at 80 °C and finally in water for 6 h. The electrochemical experiments were carried out with an electrochemical workstation (CHI 660E) using a three-electrode configuration with prepared electrodes, graphite rod and Ag/AgCl electrode (saturated KCl electrolyte) as working electrode, counter electrode and reference electrode, respectively. The

potentials reported in this work were converted to reversible hydrogen electrode (RHE) scale via calibration with the following equation:  $E \text{ (vs. RHE)} = E \text{ (vs. Ag/AgCl)} + 0.059 \times \text{pH} + 0.197 \text{ V}$  and the presented current density was normalized to the geometric surface area. For electrochemical  $\text{NO}_3^-$  reduction, chronoamperometry tests were conducted in 1 M KOH solution with 0.1 M  $\text{NO}_3^-$ .

**Determination of  $\text{NH}_3$ :** Owing to the large concentration of solution, the obtained reaction solutions were diluted 100 times. Specifically, 4 mL electrolyte was obtained from the cathodic chamber and mixed with 50  $\mu\text{L}$  oxidizing solution containing NaClO ( $\rho_{\text{Cl}} = 4 \sim 4.9$ ) and NaOH (0.75 M), 500  $\mu\text{L}$  coloring solution containing 0.4 M  $\text{C}_7\text{H}_6\text{O}_3\text{Na}$  and 0.32 M NaOH, and 50  $\mu\text{L}$  catalyst solution (1 wt%  $\text{Na}_2[\text{Fe}(\text{CN})_5\text{NO}]$ ) for 2 h. Absorbance measurements were performed at 654 nm. The concentration-absorbance curve was calibrated using standard  $\text{NH}_3$  solution with a series of concentrations. The fitting curve ( $y = 0.31647 x + 0.03549$ ,  $R^2 = 0.999$ ) shows good linear relation of absorbance value with  $\text{NH}_3$  concentration.

In addition,  $^1\text{H}$  NMR spectroscopy (600 MHz) was also used to detect ammonia in the isotope-labelling measurement. The collected  $\text{NH}_3$  sample was first diluted to the detection range and adjust to pH 1.0 by adding 0.1 M HCl. Next, 0.5 ml of the sample solution was mixed 0.1ml DMSO- $d_6$ .

**Determination of  $\text{NO}_2^-$ :** Owing to the large concentration of solution, the obtained reaction solutions were diluted 20 times. The  $\text{NO}_2^-$  concentration was analyzed using the Griess test.<sup>1</sup> The Griess reagent was prepared by dissolving 0.1 g N-(1-naphthyl) ethylenediamine dihydrochloride, 1.0 g sulfonamide and 2.94 mL  $\text{H}_3\text{PO}_4$  in 50 mL

deionized water. In a typical colorimetric assay, the 1.0 mL Griess reagent was mixed with the 1.0 mL nitrite-containing solution and 2.0 mL H<sub>2</sub>O and allowed to react at room temperature for 10 min, in which sulfonamide reacts with NO<sub>2</sub><sup>-</sup> to form a diazonium salt and then further reacts with amine to form an azo dye (magenta). The absorbance at 540 nm was measured to quantify the NO<sub>2</sub><sup>-</sup> concentration with a standard curve of NO<sub>2</sub><sup>-</sup> ( $y = 0.5391x + 0.0106$ ,  $R^2 = 0.999$ ).

**Determination of FE and NH<sub>3</sub> yield:** The FE for NO<sub>3</sub><sup>-</sup> reduction was defined as the amount of electric charge used for synthesizing NH<sub>3</sub> divided the total charge passed through the electrodes during the electrolysis. The total amount of NH<sub>3</sub> produced was measured using colorimetric methods. Assuming eight electrons were needed to produce one NH<sub>3</sub> molecule, the FE could be calculated as follows:

$$FE = 8 \times F \times [\text{NH}_3] \times V / (17 \times Q) \times 100\% \quad (1)$$

NH<sub>3</sub> yield was calculated using the following equation:

$$\text{NH}_3 \text{ yield rate} = [\text{NH}_3] \times V / (s \times t) \quad (2)$$

where F is the Faraday constant, [NH<sub>3</sub>] is the measured NH<sub>3</sub> concentration, V is the volume of the electrolyte in the cathodic chamber, Q is the total quantity of applied electricity; t is the reduction time; s is the electrode area.

**Computational Details:** All the calculations were implemented in the VASP package by employing density functional theory (DFT) with spin-polarized Perdew-Burke-Ernzerhof (PBE) exchange-correlation functional.<sup>1,2</sup> The cutoff energy of plane-wave basis set is 400 eV, and the (2×2×1) grid sampling was used for Brillouin zone integration of Co<sub>3</sub>O<sub>4</sub> (110) slab, respectively. The DFT+U method was adopted to

describe the Co  $3d$  electrons with an effective  $U$  value of 2 eV.<sup>3,4</sup> The convergence criteria of energy and force for structural optimization were set to  $1 \times 10^{-5}$  eV and 0.02 eV/Å, respectively. All the slabs were repeated periodically with a 20 Å vacuum layer between the images in the direction of the surface normal.

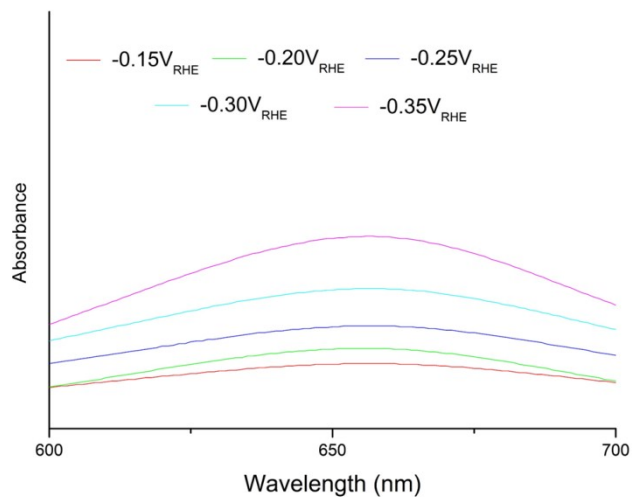

**Fig. S1.** UV-Vis absorption spectra of N-Co<sub>3</sub>O<sub>4</sub>.

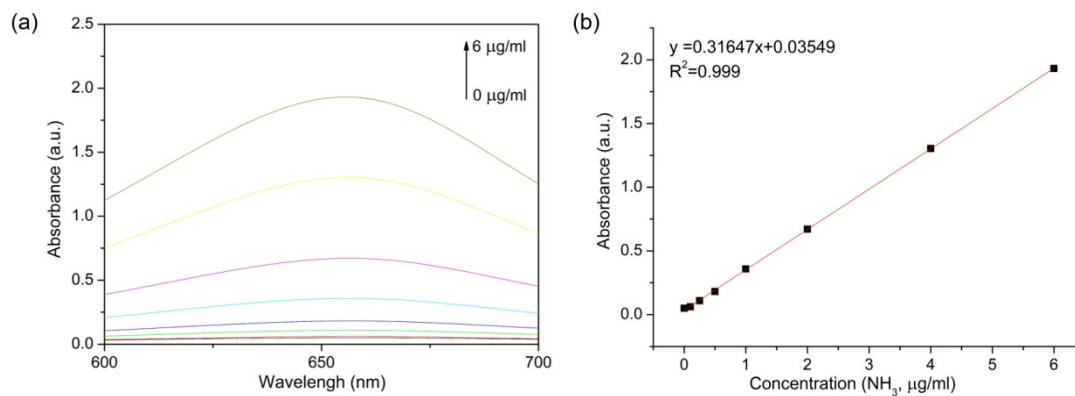

**Fig. S2.** (a) UV-vis absorption spectra of indophenol assays with NH<sub>3</sub> concentrations after incubated for 2 h at room temperature. (b) Calibration curve used for estimation of NH<sub>3</sub> concentration.

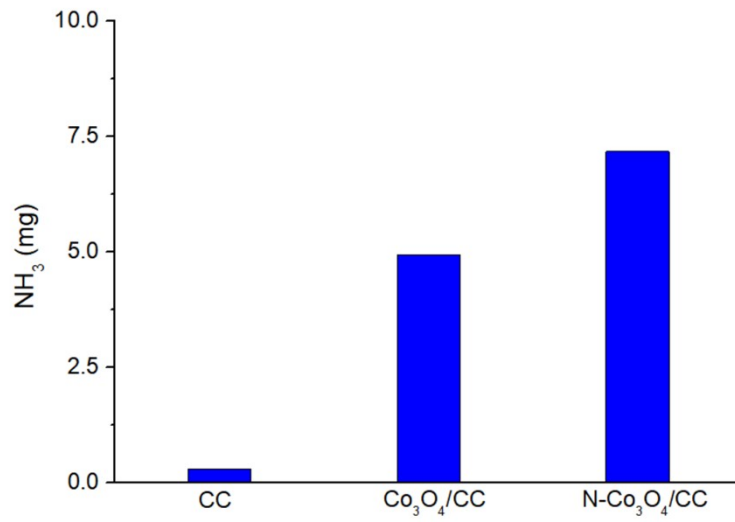

**Fig. S3.** The comparison of NH<sub>3</sub> production amount on N-Co<sub>3</sub>O<sub>4</sub>/CC, Co<sub>3</sub>O<sub>4</sub>/CC and bare CC.

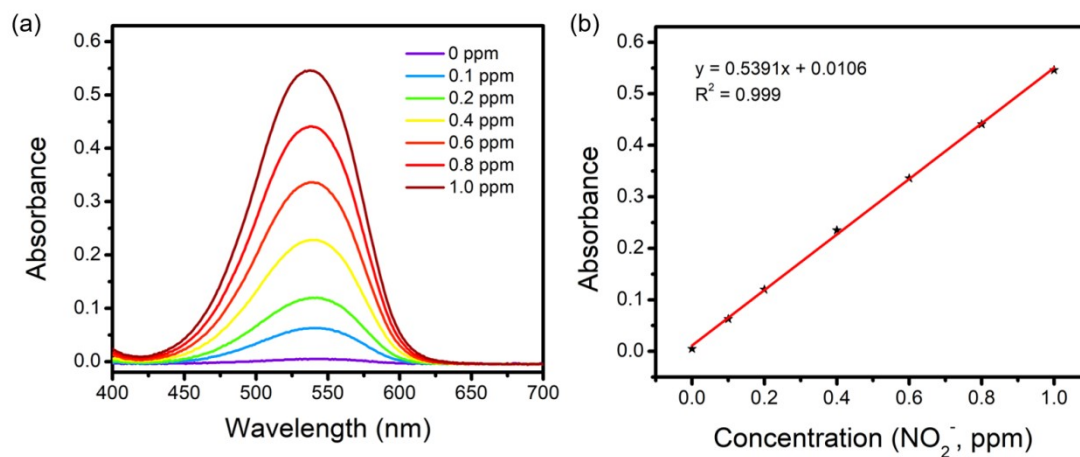

**Fig. S4.** (a) UV-Vis absorption spectra of different  $\text{NO}_2^-$  concentrations after incubated for 10 min at room temperature. (b) Calibration curve used for estimation of  $\text{NO}_2^-$  concentration.



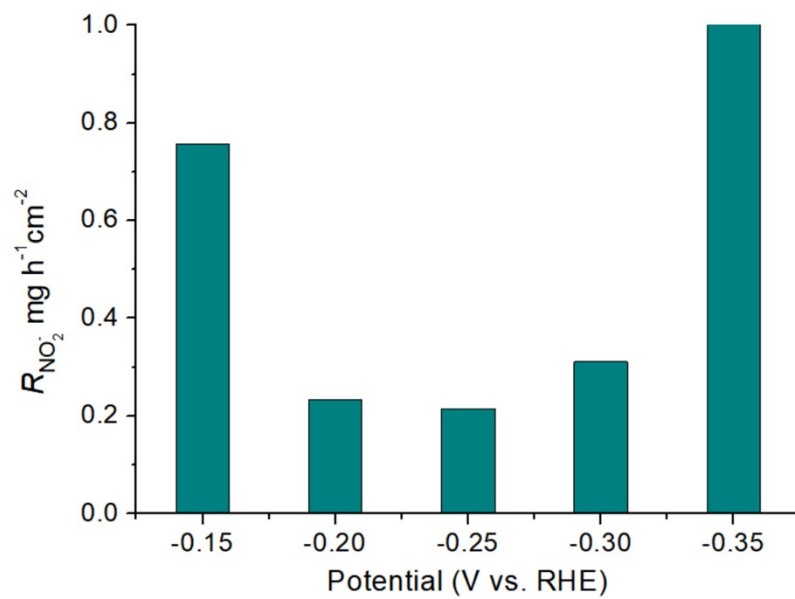

**Fig. S5.**  $\text{NO}_2^-$  yield rates over N- $\text{Co}_3\text{O}_4/\text{CC}$  at each given potentials.

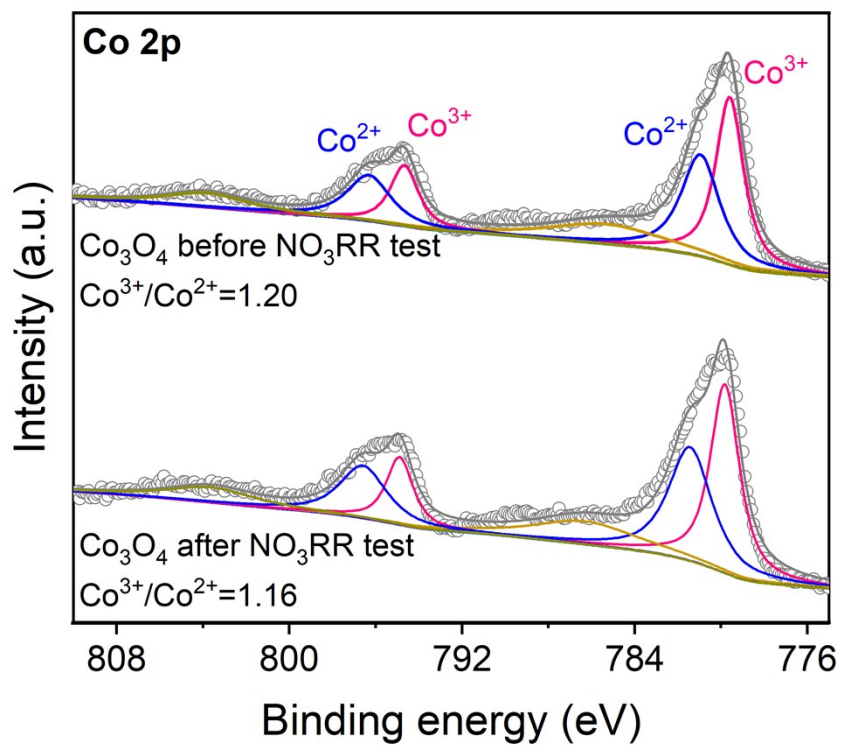

**Fig. S6.** XPS spectrum in Co 2p region on Co<sub>3</sub>O<sub>4</sub>/CC after NO<sub>3</sub>RR.

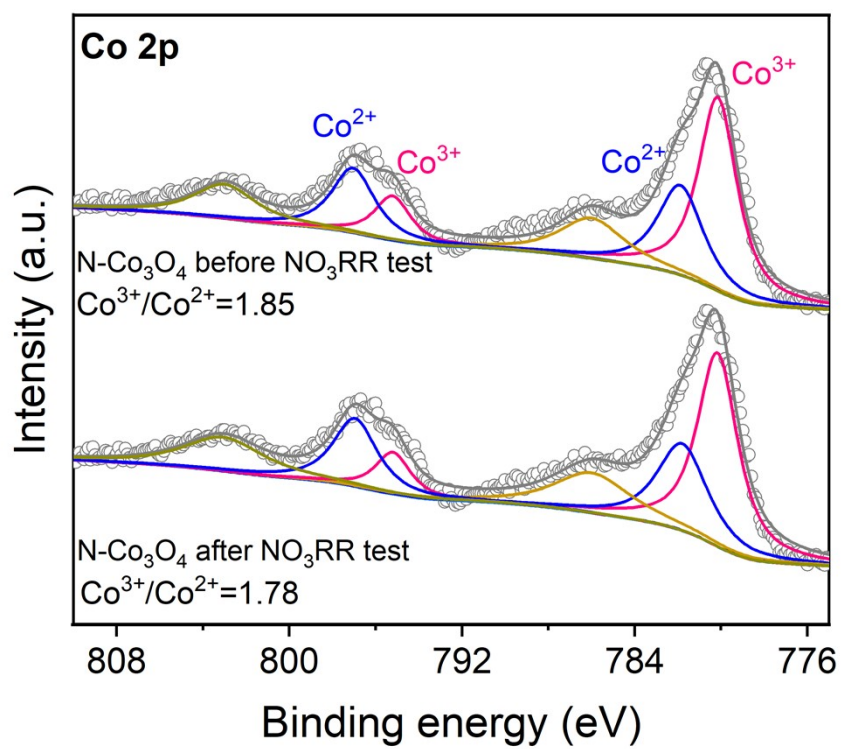

**Fig. S7.** XPS spectrum in Co 2p region on N-Co<sub>3</sub>O<sub>4</sub>/CC after NO<sub>3</sub>RR.

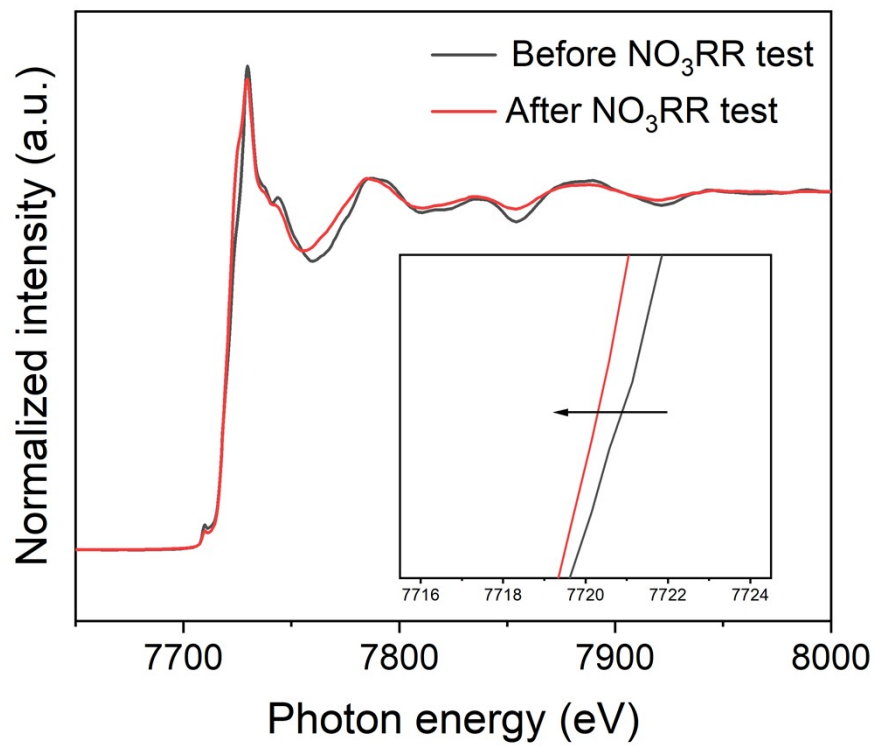

**Fig. S8.** Co K-edge XANES spectra of N-Co<sub>3</sub>O<sub>4</sub> after NO<sub>3</sub>RR. It shows that the Co valence state slightly decreases after NO<sub>3</sub>RR.

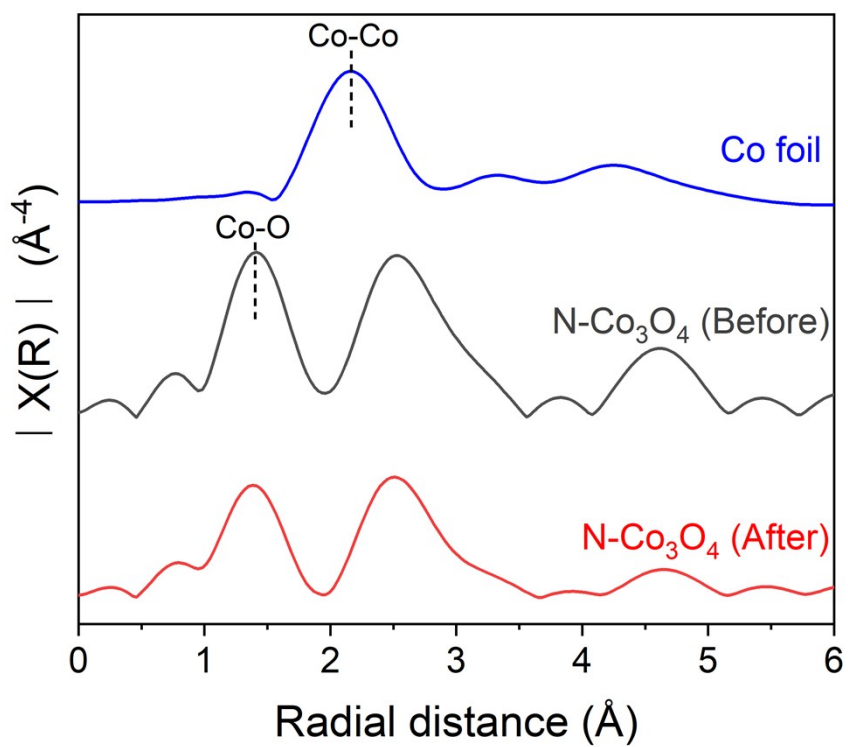

**Fig. S9.** The Fourier transform EXAFS spectra for N-Co<sub>3</sub>O<sub>4</sub> after NO<sub>3</sub>RR.

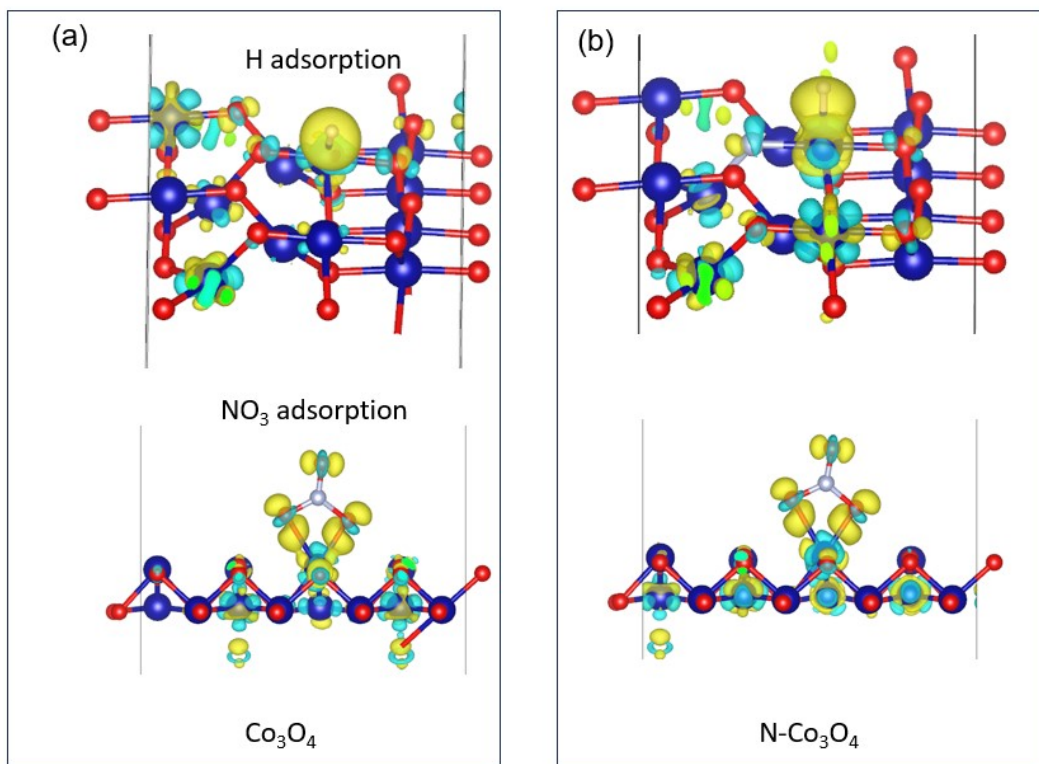

**Fig. S10.** The atom configurations of NO<sub>3</sub> and H adsorptions on Co<sub>3</sub>O<sub>4</sub> (110) and N-Co<sub>3</sub>O<sub>4</sub> (110), respectively.

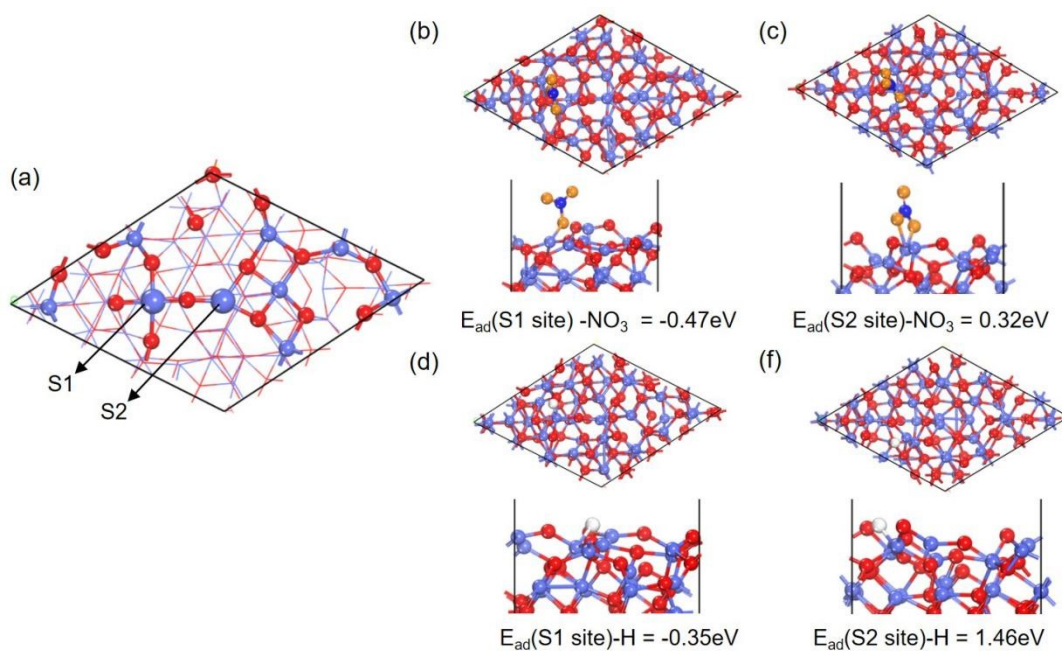

**Fig. S11.** Adsorption energies of  $\text{NO}_3$  and H on Co atom site on pure  $\text{Co}_3\text{O}_4$  (111) surface. (a) Atomic configuration of  $\text{Co}_3\text{O}_4$  (111) surface. (a,b) Adsorption energies of  $\text{NO}_3$  on Co atom sites. (a,b) Adsorption energies of H on Co atom sites.

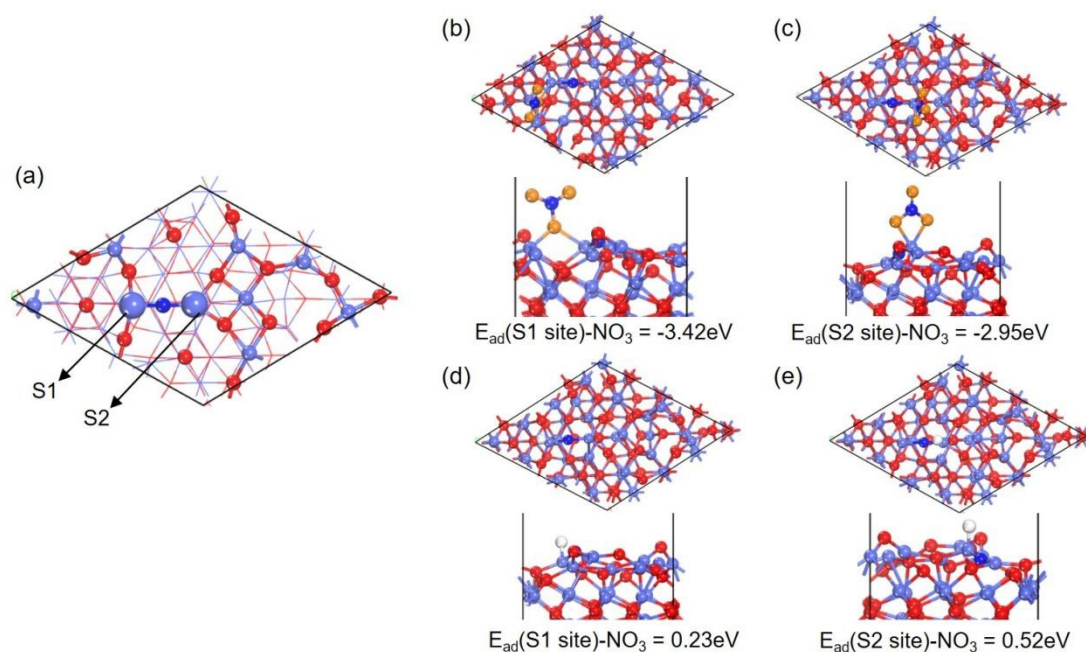

**Fig. S12.** Adsorption energies of  $\text{NO}_3$  and H on Co atom site on N-doped  $\text{Co}_3\text{O}_4$  (111) surface. (a) Atomic configuration of  $\text{N-Co}_3\text{O}_4$  (111) surface. (a,b) Adsorption energies of  $\text{NO}_3$  on Co atom sites. (a,b) Adsorption energies of H on Co atom sites.

We recalculated the adsorption energies of H and NO<sub>3</sub> on the Co<sub>3</sub>O<sub>4</sub> (111) surface, Fig. S11. Our results indicate that the Co<sub>3</sub>O<sub>4</sub>(111) surface features two distinct Co atomic sites, S1 and S2, corresponding to four-coordinated Co (Co<sub>4c</sub>) and three-coordinated Co (Co<sub>3c</sub>), respectively. Both NO<sub>3</sub> and H preferentially adsorb on the Co<sub>4c</sub> site of S1 due to their exothermic adsorption energies. Notably, the adsorption energies of NO<sub>3</sub> and H at S1 are quite close, with NO<sub>3</sub> being slightly more favorable, suggesting intense competitive adsorption relationship between these species on pure Co<sub>3</sub>O<sub>4</sub>(111) surface.

As introducing N doping into the Co<sub>3</sub>O<sub>4</sub>(111) surface (Fig. S12), the adsorption energies of NO<sub>3</sub> at the S1 and S2 sites are greatly increased to -3.42 eV and -2.95 eV, respectively, indicating greatly enhanced NO<sub>3</sub> adsorption. In contrast, the adsorption of H became endothermic, suggesting that H adsorption process is significantly suppressed. Thus, above results demonstrate that N doping in the Co<sub>3</sub>O<sub>4</sub>(111) surface also promotes NO<sub>3</sub> adsorption while inhibiting H adsorption, similar with that Co<sub>3</sub>O<sub>4</sub>(110) surface.



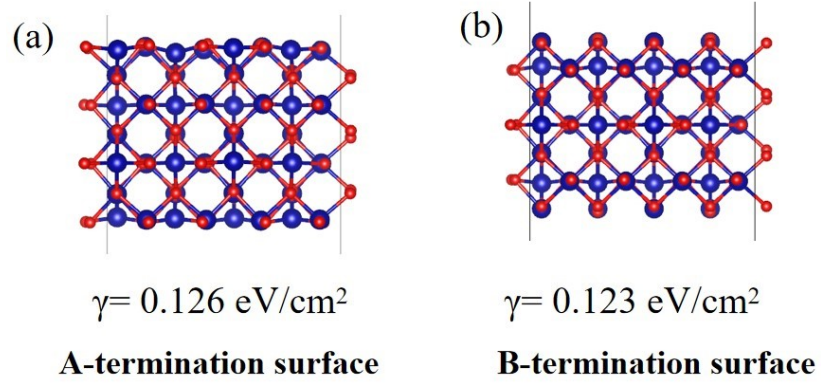

**Fig. S13.** The surface energies of  $\text{Co}_3\text{O}_4$  (110) at different terminated conditions. (a) Type A termination surface. (b) Type B termination surface.

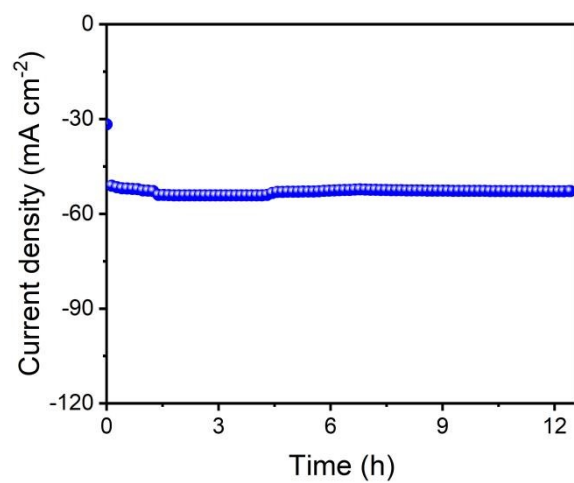

**Fig. S14.** NO<sub>3</sub>RR electrolysis for 13 h on N-Co<sub>3</sub>O<sub>4</sub>/CC electrode.

**Table S1.** Comparison of the catalytic performances of CoS<sub>2</sub> OC with reported Co-based NO<sub>3</sub>RR catalysts at ambient conditions.

| Catalyst                                | Electrolyte                                                                   | NH <sub>3</sub> yield rate<br>( $\mu\text{mol h}^{-1} \text{cm}^{-2}$ @V vs. RHE) | FE<br>(%@V vs. RHE) | Ref.      |
|-----------------------------------------|-------------------------------------------------------------------------------|-----------------------------------------------------------------------------------|---------------------|-----------|
| N-Co <sub>3</sub> O <sub>4</sub>        | 1 M KOH (0.1 M NO <sub>3</sub> <sup>-</sup> )                                 | 422@ -0.35V                                                                       | 96.7 %@ -0.20V      | This work |
| CoS <sub>2</sub> OC                     | 1 M KOH (0.1 M NO <sub>3</sub> <sup>-</sup> )                                 | 588 @ -0.35V                                                                      | 97.5 @ -0.25V       | [1]       |
| CuCo                                    | 1 M KOH (0.1 M NO <sub>3</sub> <sup>-</sup> )                                 | 4800 @ -0.2                                                                       | 100 @ -0.2          | [2]       |
| Co@TiO <sub>2</sub> /TP                 | 0.1 M PBS (0.1 M NO <sub>3</sub> <sup>-</sup> )                               | 800 @ -0.40V                                                                      | 96.7 @ -0.70V       | [3]       |
| Co-P/TP                                 | 0.2 M PBS (200 ppm NO <sub>3</sub> <sup>-</sup> )                             | 24.47 @ -0.6                                                                      | 93.6 @ -0.3         | [4]       |
| Co <sub>2</sub> AlO <sub>4</sub> /CC    | 0.1 M PBS (0.1 M NO <sub>3</sub> <sup>-</sup> )                               | 464.7 @ -0.9                                                                      | 92.6 @ -0.7         | [5]       |
| Co/CoO NSA                              | 0.1 M Na <sub>2</sub> SO <sub>4</sub> (200 ppm NO <sub>3</sub> <sup>-</sup> ) | 194.46 @ -0.65                                                                    | 93.8 @ -0.65        | [6]       |
| ZnCo <sub>2</sub> O <sub>4</sub> NSA/CC | 0.1 M NaOH (0.1 M NO <sub>3</sub> <sup>-</sup> )                              | 634.74 @ -0.8                                                                     | 98.33 @ -0.6        | [7]       |
| CoTiO <sub>3-x</sub> /CP                | 1 M KOH (0.1 M NO <sub>3</sub> <sup>-</sup> )                                 | 858 @ -1.0                                                                        | 92.6 @ -1.0         | [8]       |
| NiCo <sub>2</sub> O <sub>4</sub> /CC    | 0.1 M NaOH (0.1 M NO <sub>3</sub> <sup>-</sup> )                              | 973.2 @ -0.6                                                                      | 99 @ -0.3           | [9]       |
| CoP NAs/CFC                             | 1 M NaOH (1 M NO <sub>3</sub> <sup>-</sup> )                                  | 956 @ -0.3                                                                        | 100 @ -0.3          | [10]      |
| Mn-Co <sub>3</sub> O <sub>4</sub>       | 0.5 M K <sub>2</sub> SO <sub>4</sub> (0.1 M NO <sub>3</sub> <sup>-</sup> )    | 2058 @ -1.2                                                                       | 99.5 @ -1.2         | [11]      |
| Fe <sub>3</sub> C                       | 0.1 M NaOH                                                                    | 466 @ -0.8                                                                        | 96.9 @ -0.8         | [12]      |

|                                    |                                                     |                 |                |      |
|------------------------------------|-----------------------------------------------------|-----------------|----------------|------|
| NPs@NCF                            | (0.1 M NO <sub>3</sub> <sup>-</sup> )               |                 |                |      |
| Cu nanosheets                      | 0.1 M KOH<br>(10 mM KNO <sub>3</sub> )              | 21.67 @ -0.15 V | 99.7 @ -0.15 V | [13] |
| FeCo <sub>2</sub> O <sub>4</sub>   | 0.1 M NaOH<br>(20 mM NaNO <sub>3</sub> )            | 277.1 @ -0.5V   | 95.9           | [14] |
| Cu <sub>50</sub> Ni <sub>50</sub>  | 1 M KOH<br>(100 mM NO <sub>3</sub> <sup>-</sup> )   | 80.7 @ -0.15    | 82.0 @ -0.15   | [15] |
| Fe <sub>3</sub> O <sub>4</sub> /PC | 0.1 M NaOH<br>(0.1 M NO <sub>3</sub> <sup>-</sup> ) | 394.8 @ -0.4    | 91.6 @ -0.4    | [16] |

## REFERENCES

- [1] W. Li, P. Wang, P. Wang, H. Liu, C. Wu, Y. Liu, J. Huang, Z. Fang, H. Guo, Y. Zhang, F. Li, T. Wu and X. Sun, Octahedral CoS<sub>2</sub> electrocatalysts for efficient nitrate reduction to ammonia, *Inorg. Chem. Front.*, 2024, **11**, 7118.
- [2] J. Fang, Q. Zheng, Y. Lou, K. Zhao, S. Hu, G. Li, O. Akdim, X. Huang and S. Sun, Ampere-level current density ammonia electrochemical synthesis using CuCo nanosheets simulating nitrite reductase bifunctional nature, *Nat. Commun.*, 2022, **13**, 7899.
- [3] X. Fan, D. Zhao, Z. Deng, L. Zhang, J. Li, Z. Li, S. Sun, Y. Luo, D. Zheng, Y. Wang, B. Ying, J. Zhang, A. A. Alshehri, Y. Lin, C. Tang, X. Sun and Y. Zheng, Constructing Co@TiO<sub>2</sub> nanoarray heterostructure with schottky contact for selective electrocatalytic nitrate reduction to ammonia, *Small*, 2023, **19**, 2208036.
- [4] Z. Li, G. Wen, J. Liang, T. Li, Y. Luo, Q. Kong, X. Shi, A. M. Asiri, Q. Liu and X. Sun, High-efficiency nitrate electroreduction to ammonia on electrodeposited cobalt - phosphorus alloy film, *Chem. Commun.*, 2021, **57**, 9720.
- [5] Z. Deng, J. Liang, Q. Liu, C. Ma, L. Xie, L. Yue, Y. Ren, T. Li, Y. Luo, N. Li, B. Tang, A. A. Alshehri, I. Shakir, P. O. Agboola, S. Yan, B. Zheng, J. Du, Q. Kong and X. Sun, High-efficiency ammonia electrosynthesis on self-supported

- Co<sub>2</sub>AlO<sub>4</sub> nanoarray in neutral media by selective reduction of nitrate, *Chem. Eng. J.*, 2020, **435**, 135104.
- [6] Y. Yu, C. Wang, Y. Yu, Y. Wang and B. Zhang, Promoting selective electroreduction of nitrates to ammonia over electron-deficient Co modulated by rectifying Schottky contacts, *Sci. China Chem.*, 2020, **63**, 1469.
- [7] Z. Li, J. Liang, Q. Liu, L. Xie, L. Zhang, Y. Ren, L. Yue, N. Li, B. Tang, A. A. Alshehri, M. S. Hamdy, Y. Luo, Q. Kong and X. Sun, High-efficiency ammonia electrosynthesis via selective reduction of nitrate on ZnCo<sub>2</sub>O<sub>4</sub> nanosheet array, *Mater. Today Phys.*, 2022, **23**, 100619.
- [8] X. Fan, J. Liang, L. Zhang, D. Zhao, L. Yue, Y. Luo, Q. Liu, L. Xie, N. Li, B. Tang, Q. Kong and X. Sun, Enhanced electrocatalytic nitrate reduction to ammonia using plasma-induced oxygen vacancies in CoTiO<sub>3-x</sub> nanofiber, *Carbon Neutralization*, 2022, **1**, 6.
- [9] Q. Liu, L. Xie, J. Liang, Y. Ren, Y. Wang, L. Zhang, L. Yue, T. Li, Y. Luo, N. Li, B. Tang, Y. Liu, S. Gao, A. A. Alshehri, I. Shakir, P. O. Agboola, Q. Kong, Q. Wang, D. Ma and X. Sun, Ambient Ammonia Synthesis via Electrochemical Reduction of Nitrate Enabled by NiCo<sub>2</sub>O<sub>4</sub> Nanowire Array, *Small*, 2022, **18**, 2106961.
- [10] S. Ye, Z. Chen, G. Zhang, W. Chen, C. Peng, X. Yang, L. Zheng, Y. Li, X. Ren, H. Cao, D. Xue, J. Qiu, Q. Zhang and J. Liu, Elucidating the activity, mechanism and application of selective electrosynthesis of ammonia from nitrate on cobalt phosphide, *Energy Environ. Sci.*, 2022, **15**, 760.
- [11] D. Liu, L. Qiao, Y. Chen, P. Zhou, J. Feng, C. C. Leong, K. W. Ng, S. Peng, S. Wang, W. F. Ip and H. Pan, Electrocatalytic reduction of nitrate to ammonia on low-cost manganese-incorporated Co<sub>3</sub>O<sub>4</sub> nanotubes, *Appl. Catal., B*, 2023, **324**, 122293.
- [12] X. Liu, T. Xie, Z. Cai, Z. Li, L. Zhang, X. Fan, D. Zhao, S. Sun, Y. Luo, Q. Liu, and X. Sun, Fe<sub>3</sub>C nanoparticles decorated 3D nitrogen-doped carbon foam as a highly efficient electrocatalyst for nitrate reduction to ammonia. *J. Electroanal. Chem.*, 2023, **933**, 117295.

- [13] X. Fu, X. Zhao, X. Hu, K. He, Y. Yu, T. Li, Q. Tu, X. Qian, Q. Yue, M. R. Wasielewski, Y. Kang, Alternative route for electrochemical ammonia synthesis by reduction of nitrate on copper nanosheets. *Appl. Mater. Today*, 2020, **19**, 100620.
- [14] J. Li, D. Zhao, L. Zhang, L. Yue, Y. Luo, Q. Liu, N. Li, A. A. Alshehri, M. S. Hamdy, Q. Li, X. Sun, A FeCo<sub>2</sub>O<sub>4</sub> nanowire array enabled electrochemical nitrate conversion to ammonia. *Chem. Commun.*, **2022**, 58, 4480-4483.
- [15] Y. Wang, A. Xu, Z. Wang, L. Huang, J. Li, F. Li, J. Wicks, M. Luo, D. Nam, C. Tan, Y. Ding, J. Wu, Y. Lum, C. Dinh, D. Sinton, G. Zheng and E. Sargent, Enhanced nitrate-to-ammonia activity on copper-nickel alloys via tuning of intermediate adsorption. *J. Am. Chem. Soc.*, 2020, 142, 5702-5708.
- [16] T. Xie, Z. Cai, X. Liu, J. Li, X. Fan, X. He, Y. Luo, D. Zheng, S. Sun, S. Alfaifi, C. Xu, X. Sun, Fe<sub>3</sub>O<sub>4</sub> nanoparticle-decorated 3D pinewood-derived carbon for high-efficiency electrochemical nitrate reduction to ammonia. *Chem. Commun.*, 2023, 59, 12322-12325.
